# Supplementary material for: Pelvic bone marrow sparing intensity modulated radiotherapy reduces the incidence of the hematologic toxicity of patients with cervical cancer receiving concurrent chemoradiotherapy: a single-center prospective randomized controlled trial
Source: Springer Nature journal article supplement (doi:10.1186/s13014-020-01606-3), 2020-07-29

A

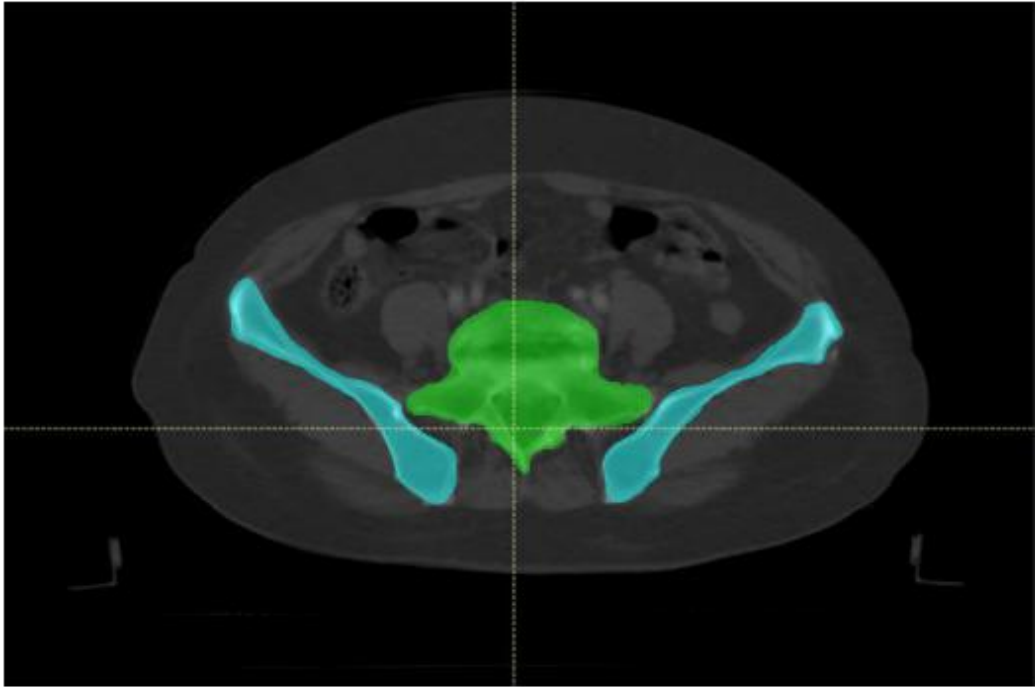

B

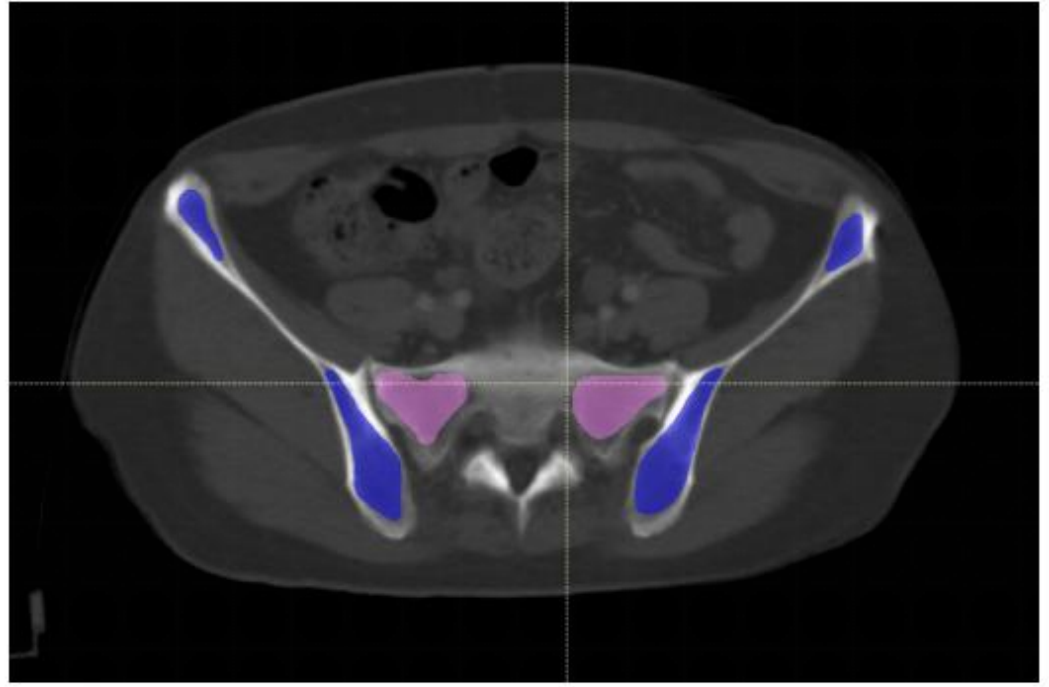

Supplement: MOESM2 [file 18230068]
